# Supplementary material for: Properties of ionic liquids on Au surfaces: non-conventional anion exchange reactions with carbonate
Source: Royal Society of Chemistry journal article supplement (doi:10.1039/c1cc13914b), 2011-01-01
Supplement: c1cc13914b.pdf [file c1cc13914b.pdf]

## Supporting information for:

### Properties of ionic liquids on Au surfaces: Non conventional anion exchange reactions with carbonate

Mathieu Ratel, Mathieu Branca, Julien Breault-Turcot, Sandy Shuo Zhao, Pierre Chaurand, Andreea R. Schmitzer\*, and Jean-Francois Masson\*<sup>b</sup>

Department of Chemistry, Université de Montréal, C.P. 6128 Succ. Centre-Ville, Montreal, QC, Canada, H3C 3J7

#### *Experimental Section*

MDMI-Br was synthesized as previously described by Lee *and al.*<sup>1</sup>. The MDMI-carboxylate was synthesized as described by Voutchkova and al.<sup>2</sup>. Gold-coated glass slides were prepared by deposition of 1 nm Cr and 50 nm Au by sputter deposition. The RT-IL SAM was formed by soaking the Au-coated slides in a 5 mM solution of 1-(12-mercaptododecyl)-3-methylimidazolium bromide (MDMI-Br) in ethanol for 16 hours at 4°C. Thereafter, the gold slides were immersed in a salt solution (10 mM in water) to exchange the bromide anion with BF<sub>4</sub><sup>-</sup>, PF<sub>6</sub><sup>-</sup> or NTf<sub>2</sub><sup>-</sup>. Immersing the Au slides coated with RT-IL-X (X = Br<sup>-</sup>, BF<sub>4</sub><sup>-</sup>, PF<sub>6</sub><sup>-</sup> or NTf<sub>2</sub><sup>-</sup>) in a bicarbonate buffer (20 mM NaHCO<sub>3</sub>, 9g/L NaCl and pH = 7.60) for 16 hours resulted in anion exchange. To evaluate if the metathesis is reversible to the initial counter anion, the Au slides were immersed once again in the respective salt solution (10 mM in water) for 16 hours. Aqueous contact angle was measured for all samples. A 30 µL drop of water was deposited on the RT-IL SAM. A picture of the droplet was acquired with a digital camera and the contact angle was measured using Image J (freeware available on the website of the National Institutes of Health – NIH). Mid-IR analysis of the RT-IL SAM and the anion exchange process was performed on a FTIR equipped with a Ge attenuated total reflection accessory (Bruker optics) with 4 cm<sup>-1</sup> resolution. XPS measurements were performed using an ESCALAB 3 MKII with a Mg K<sub>a</sub> source at a power of 206 W and a 0.05 eV resolution. The XPS data were obtained by averaging four identically prepared samples.

For MS analysis, 10 mg/mL solution of 2,5-dihydroxybenzoic acid dissolved in 1:1 ethanol/H<sub>2</sub>O + 0.1% trifluoroacetic acid (TFA) was spotted directly on the gold layer modified with the RT-IL SAM. The analyses were performed by MALDI-TOF MS using an UltrafleXtreme mass spectrometer operated by Flex Control 3.0 software (Bruker Daltonics, Billerica, MA). Data acquisition was carried out in reflectron geometry under optimized delayed extraction conditions with a source accelerating voltage of +0 – 25 kV in the *m/z* range between 10 – 2000. Flex Analysis software (Bruker Daltonics) was then used for the analyses of the mass spectra. In each case, the measurements for contact angle, mid-IR, XPS, and MS were performed on the RT-IL with the original anion and after exchange in bicarbonate buffer.

Au NPs were synthesized by citrate reduction of AuCl<sub>4</sub><sup>-3</sup>. Thereafter, the RT-IL was self-assembled on the gold nanoparticles by exposing the citrate-capped Au NPs to MDMI-Br. To 10 mL of gold

nanoparticle solution (5 to 10 nM), 20  $\mu\text{L}$  of MDMIBr (450  $\mu\text{M}$ ) was added and stirred for one hour. Then, 32  $\mu\text{L}$  of a 1 mM solution (Au NP agglomerate in 10 mM) specific counter anion ( $\text{BF}_4^-$ ,  $\text{PF}_6^-$  or  $\text{NTf}_2^-$ ) was added to the reaction mixture and stirred overnight. The Au NP reacted with the RT-IL was centrifuged and decanted to recuperate the Au NP. A first portion of the Au NP was set aside as a control for analysis by Raman spectroscopy. The second portion exposed to 5 mL of  $\text{HCO}_3^-$  (1 mM, 0.45 g/L NaCl, pH = 7.40) overnight. Each sample was centrifuged and decanted for analysis by Raman spectroscopy after anion exchange. The Raman spectra were acquired on a Renishaw InVia Raman microscope with a 633 nm excitation laser. Each Raman spectrum was acquired at 10% laser power (approximately 2-3 mW at the sample) with an integration time of 10 s.

### 1-undecyl-3-methylimidazolium bistrifluoromethanesulfonimide

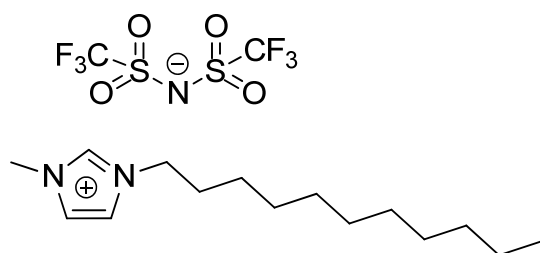

$^1\text{H-NMR}$  (400 MHz,  $\text{CDCl}_3$ ): ( $\delta$ , ppm): 0.84-0.90 (t,  $J=7.0$  Hz, 3H), 1.21-1.34 (m, 18H), 1.78-1.90 (m, 2H), 3.94 (s, 3H), 4.11-4.19 (t,  $J=7.0$  Hz, 2H), 7.28 (s, 1H), 7.31 (s, 1H), 8.75 (s, 1H).

$^{13}\text{C-NMR}$  (100 MHz,  $\text{CDCl}_3$ ): ( $\delta$ , ppm): 14.2, 22.8, 26.2, 29.0, 29.4, 29.4, 29.6, 29.7, 30.2, 32.0, 36.5, 50.4, 118.3-121.5 (d,  $J_{\text{C-F}}=320$  Hz), 122.3, 123.8, 136.2.

$^{19}\text{F-NMR}$  (160 MHz,  $\text{CDCl}_3$ ): ( $\delta$ , ppm): -79.5.

Supplementary figures and tables:

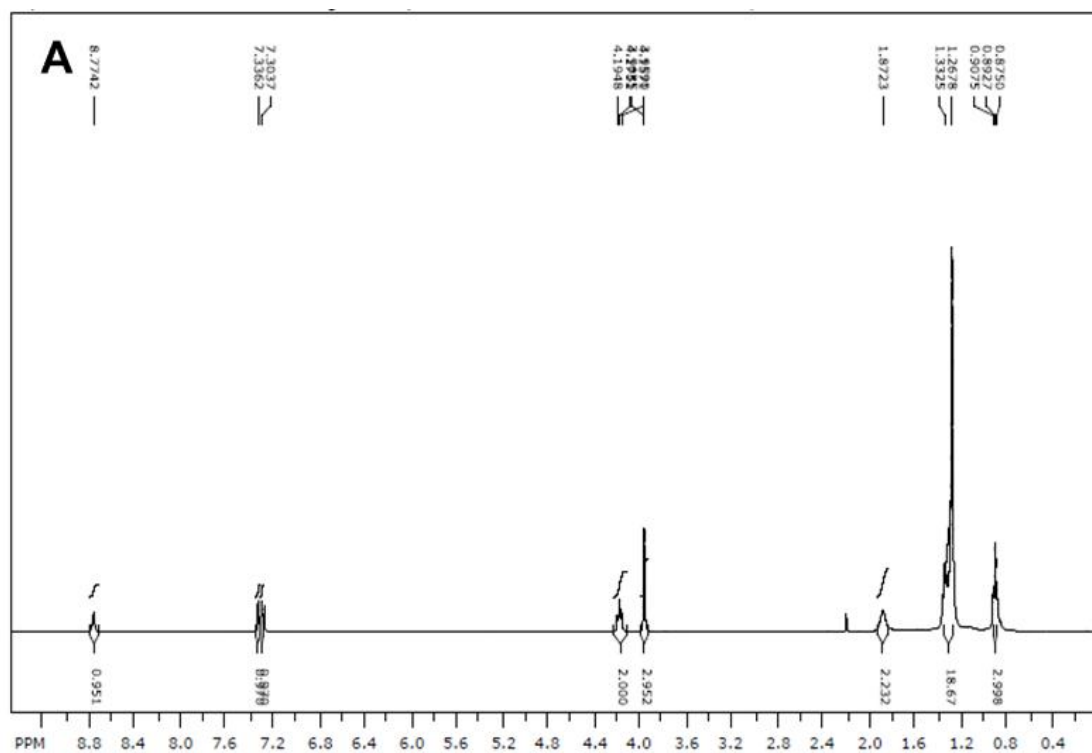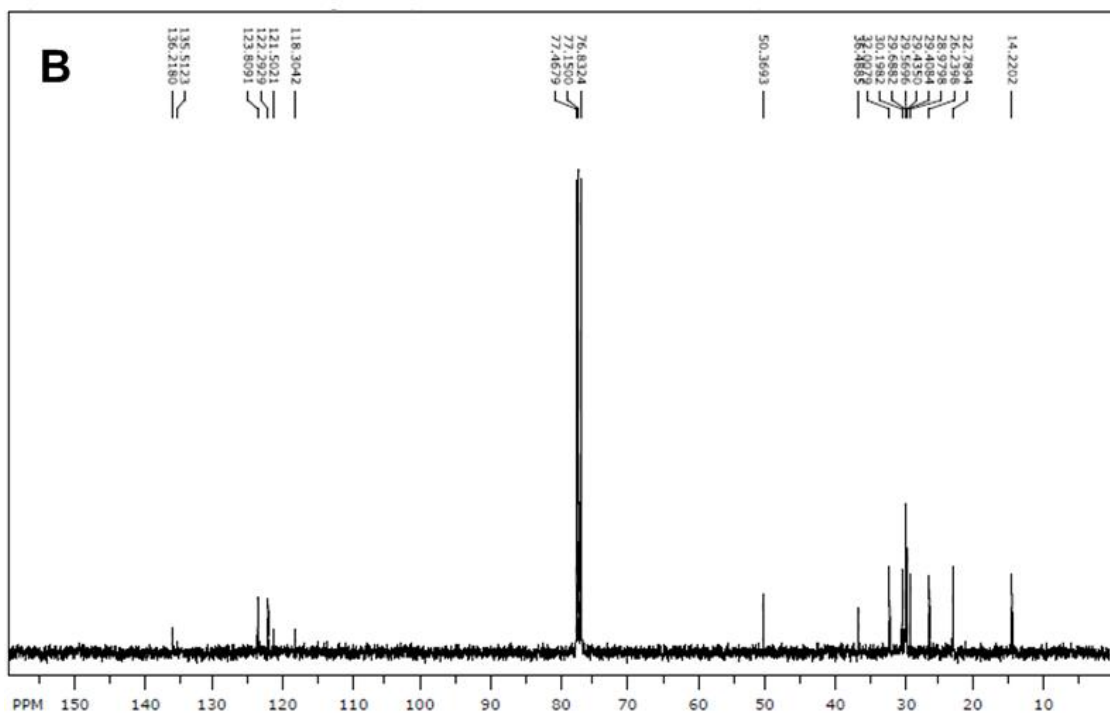

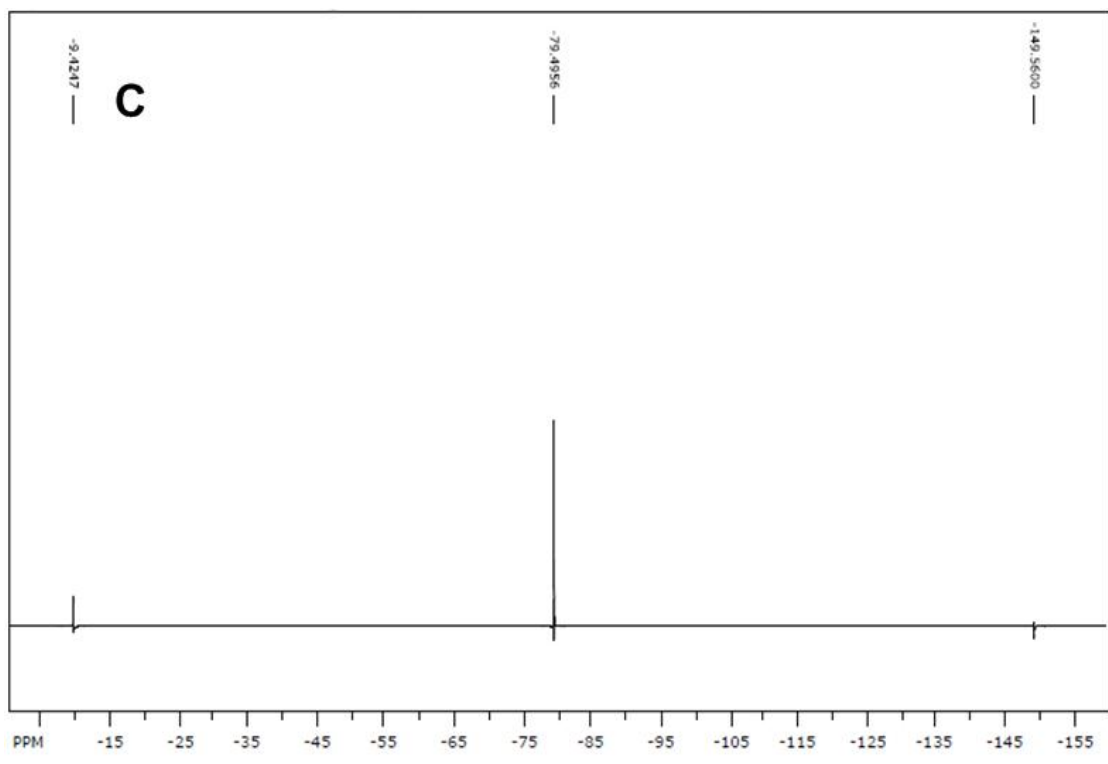

**Figure S1:** (A)  $^1\text{H}$  NMR, (B)  $^{13}\text{C}$  NMR, and (C)  $^{19}\text{F}$  NMR spectra of 1-undecyl-3-methylimidazolium  $\text{NTf}_2^-$  following the exposition of a solution to  $\text{HCO}_3^-$ . The NMR spectra are identical to the starting material, indicating that the metathesis did not occur with exposure to bicarbonate.

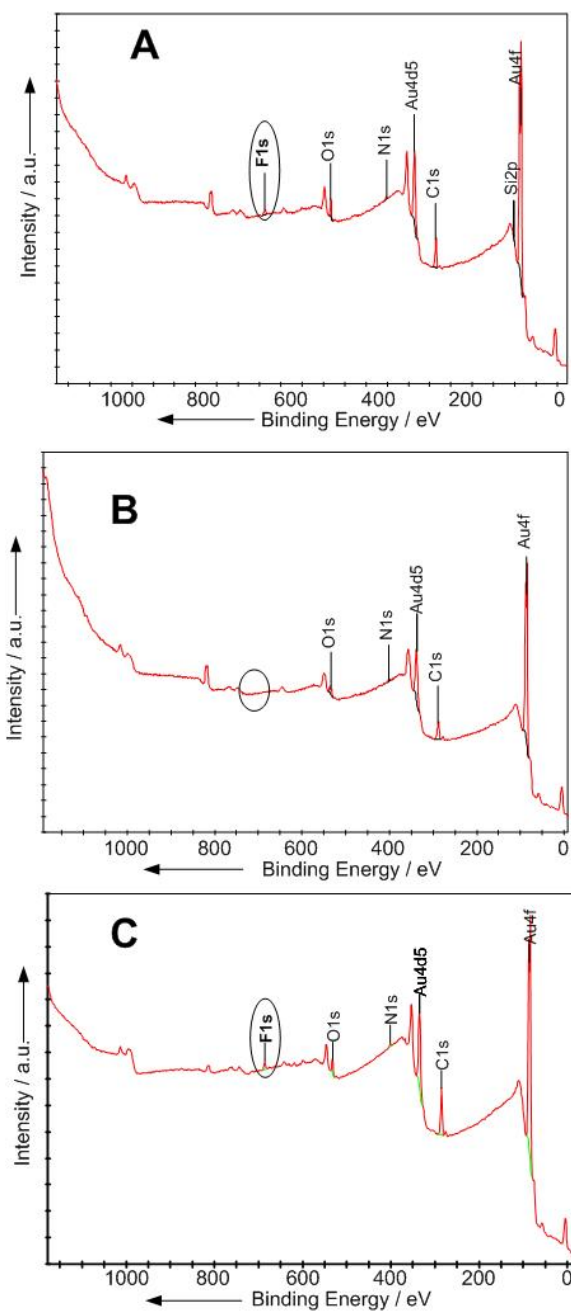

**Figure S2:** XPS spectra acquired at different steps of the anion metathesis reaction for MDMI- $\text{BF}_4$  SAM. (A) XPS spectrum of the initial surface prepared with MDMI- $\text{BF}_4$  SAM. (B) XPS spectrum of MDMI-carbonate. The exchange is evident from the peak at 690 eV, representing the fluorine 1s orbital, which disappears after anion exchange in the  $\text{HCO}_3^-$  solution. (C) XPS spectrum of the reversibility of the anion exchange, for a surface prepared as for (B) after it was exposed to  $\text{BF}_4^-$ . Table S1 exposes the peak area of the normalized fluorine fraction for every step.

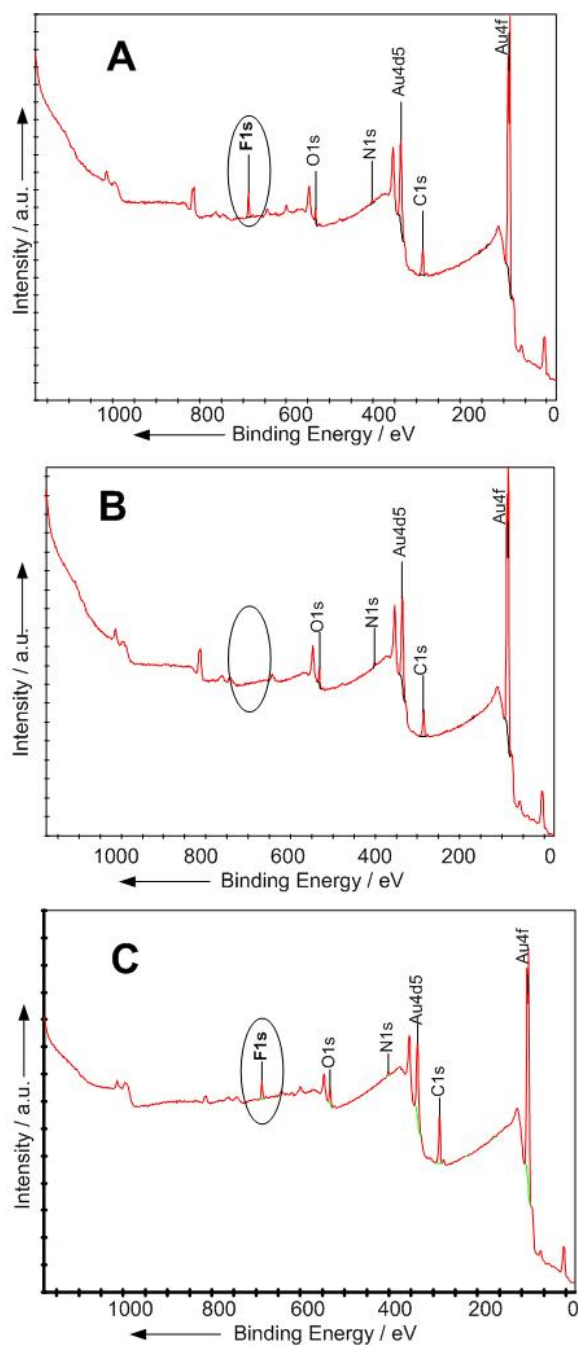

**Figure S3:** XPS spectra acquired at different steps of the anion metathesis reaction for MDMI- $\text{PF}_6$  SAM. (A) XPS spectrum of the initial surface prepared with MDMI- $\text{PF}_6$  SAM. (B) XPS spectrum of MDMI-carbonate. The exchange is evident from the peak at 690 eV, representing the fluorine 1s orbital, which disappears after anion exchange in the  $\text{HCO}_3^-$  solution. (C) XPS spectrum of the reversibility of the anion exchange, for a surface prepared as for (B) after it was exposed to  $\text{PF}_6^-$ . Table S1 exposes the peak area of the normalized fluorine fraction for every step.

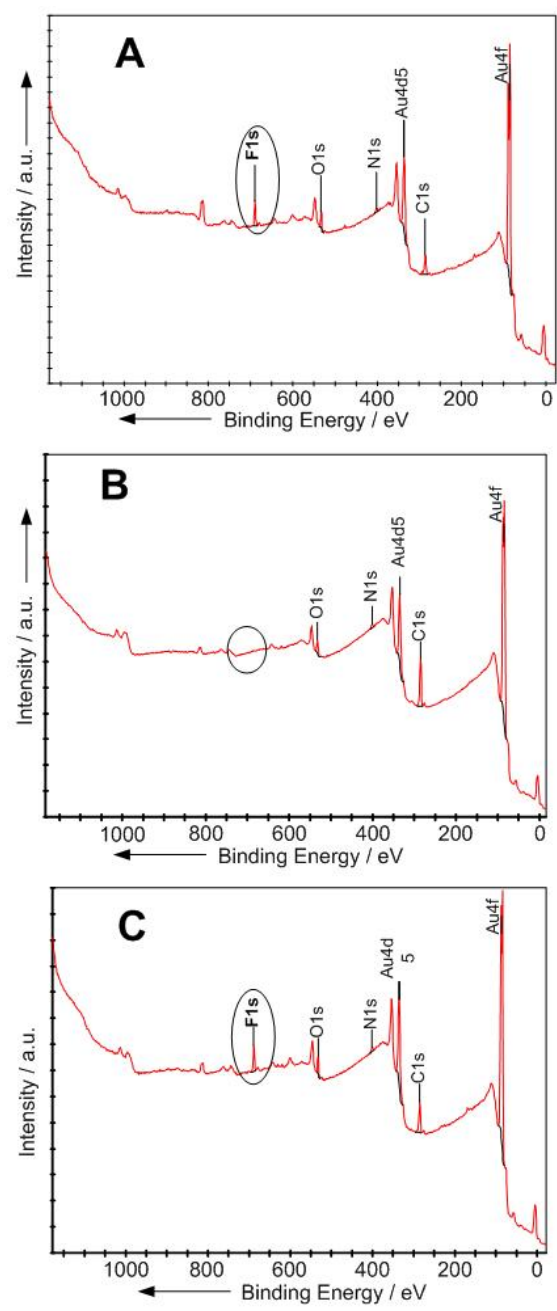

**Figure S2:** XPS spectra acquired at different steps of the anion metathesis reaction for MDMI-NTf<sub>2</sub> SAM. (A) XPS spectrum of the initial surface prepared with MDMI-NTf<sub>2</sub> SAM. (B) XPS spectrum of MDMI-carbonate. The exchange is evident from the peak at 690 eV, representing the fluorine 1s orbital, which disappears after anion exchange in the HCO<sub>3</sub><sup>-</sup> solution. (C) XPS spectrum of the reversibility of the anion exchange, for a surface prepared as for (B) after it was exposed to NTf<sub>2</sub><sup>-</sup>. Table S1 exposes the peak area of the normalized fluorine fraction for every step.

**Table S1:** XPS analysis of the fraction of fluorine for MDMI-X<sup>-</sup> IL-SAM

| Counter anion                 | As deposited  | After HCO <sub>3</sub> <sup>-</sup> exposure | After exposure to initial anion |
|-------------------------------|---------------|----------------------------------------------|---------------------------------|
| Br <sup>-</sup>               | 0.000         | 0.000                                        | 0.000                           |
| BF <sub>4</sub> <sup>-</sup>  | 0.038 ± 0.003 | 0.000                                        | 0.037 ± 0.005                   |
| PF <sub>6</sub> <sup>-</sup>  | 0.11 ± 0.01   | 0.000                                        | 0.075 ± 0.004                   |
| NTf <sub>2</sub> <sup>-</sup> | 0.11 ± 0.02   | 0.000                                        | 0.096 ± 0.009                   |



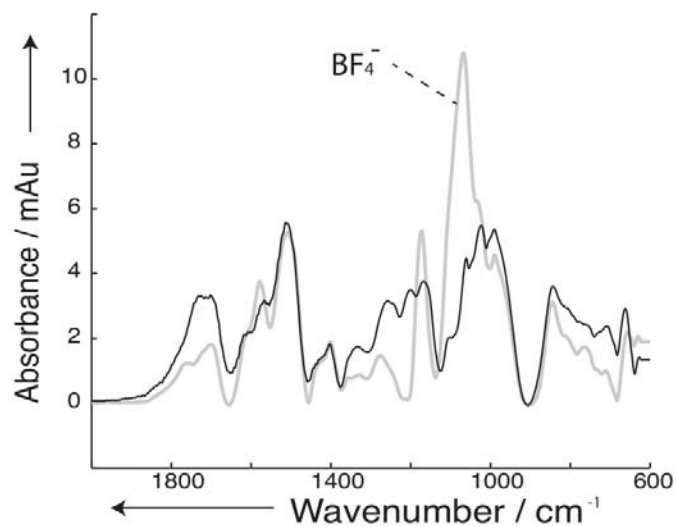

Figure S5: Mid-IR spectrum of the anion metathesis on MDMI-BF<sub>4</sub><sup>-</sup> SAM after HCO<sub>3</sub><sup>-</sup> exposure. The 1074 cm<sup>-1</sup> peak, representing the B-F vibration (gray), disappears after anion exchange in the HCO<sub>3</sub><sup>-</sup> solution (black).

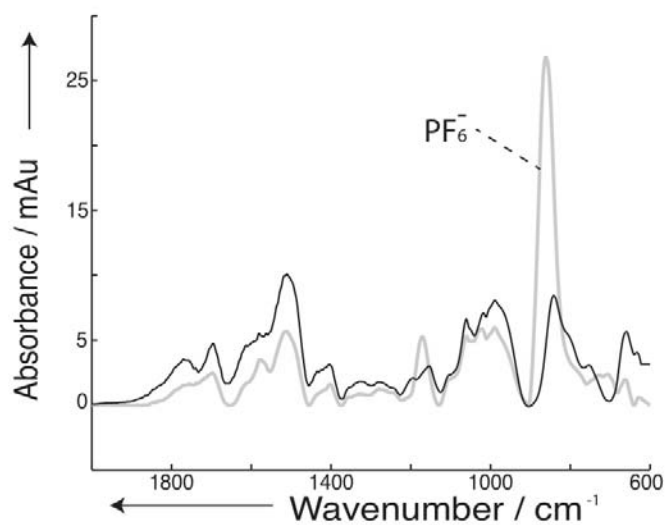

Figure S6: Mid-IR spectrum of the anion metathesis on MDMI-PF<sub>6</sub><sup>-</sup> SAM after HCO<sub>3</sub><sup>-</sup> exposure. The 866 cm<sup>-1</sup> peak, representing the P-F vibration (gray), disappears after anion exchange in the HCO<sub>3</sub><sup>-</sup> solution (black).

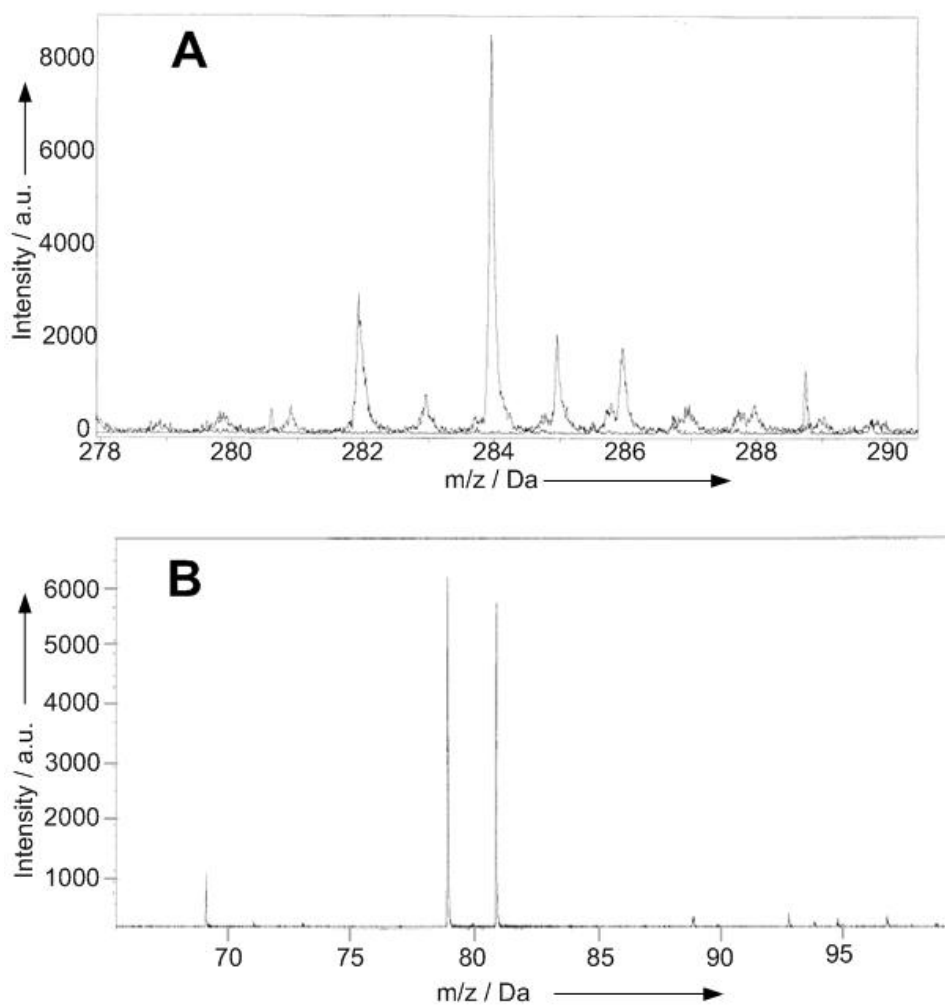

**Figure S7:** (A)  $\text{MDMI}^+$  self-assembled on gold surface is characterized by the peak at  $m/z$  of 283.8 in the positive ionization mode of the mass spectrum and (B) by the peaks for  $\text{Br}^-$  at  $m/z$  of 79 and 81 in negative ionization mode.

## References

- (1) Lee, B. S.; Chi, Y. S.; Lee, J. K.; Choi, I. S.; Song, C. E.; Namgoong, S. K.; Lee, S. *G. J. Am. Chem. Soc.* **2004**, *126*, 480.
- (2) Voutchkova, A. M.; Feliz, M.; Clot, E.; Eisenstein, O.; Crabtree, R. H. *J. Am. Chem. Soc.* **2007**, *129*, 12834.
- (3) Turkevich, J. H., J.; Stevenson, P.C. *Discuss. Faraday Soc.* **1951**, *11*, 55.
